# Supplementary material for: Stall-Feeding of Sheep on Restricted Grazing: Effects on Performance and Serum Metabolites, Ruminal Fermentation, and Fecal Microbiota
Source: MDPI journal article supplement (doi:10.3390/ani13162644), 2023-08-16
Supplement: s1 [file s1]

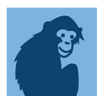

**Supplementary Table S1.** Effects of different feeding regimes on composition of fecal bacteria at the phylum of the rectal bacterial communities in Huang-huai lambs

| Phylum                    | Treatment          |                    |                    | SEM  | P-value |
|---------------------------|--------------------|--------------------|--------------------|------|---------|
|                           | CONT <sup>1</sup>  | G4H                | G8H                |      |         |
| <i>Firmicutes</i>         | 44.22 <sup>b</sup> | 52.55 <sup>a</sup> | 53.71 <sup>a</sup> | 1.61 | 0.038   |
| <i>Bacteroidetes</i>      | 39.71              | 33.08              | 32.43              | 1.42 | 0.069   |
| <i>Proteobacteria</i>     | 6.93               | 3.74               | 3.87               | 0.71 | 0.123   |
| <i>Spirochaetes</i>       | 2.49               | 3.29               | 2.54               | 0.26 | 0.43    |
| <i>Kiritimatiellaeota</i> | 2.21               | 1.92               | 1.87               | 0.22 | 0.829   |
| <i>Verrucomicrobia</i>    | 0.49               | 0.82               | 0.83               | 0.13 | 0.53    |
| <i>Lentisphaerae</i>      | 0.66               | 0.43               | 1.00               | 0.11 | 0.091   |
| <i>Fibrobacteres</i>      | 0.52               | 0.65               | 0.92               | 0.13 | 0.488   |
| <i>Actinobacteria</i>     | 0.67               | 0.67               | 0.33               | 0.16 | 0.622   |
| <i>Actinobacteria</i>     | 44.22 <sup>b</sup> | 52.55 <sup>a</sup> | 53.71 <sup>a</sup> | 1.61 | 0.038   |

<sup>a,b</sup> Means within a row with different subscripts differ when  $P < 0.05$ .

<sup>1</sup> CONT, indoor-fed lambs without access to pasture; G4H, indoor-fed lambs with daily access to pasture for four hours; G8H, indoor-fed lambs with daily access to pasture for eight hours.

**Supplementary Table S2.** Effects of different feeding regimes on composition of fecal bacteria at the genus of the rectal bacterial communities in Huang-huai lambs.

| Item                                  | Treatment         |                    |                    | SEM  | P-value |
|---------------------------------------|-------------------|--------------------|--------------------|------|---------|
|                                       | CONT <sup>1</sup> | G4H                | G8H                |      |         |
| Ruminococcaceae UCG-005               | 6.53 <sup>b</sup> | 10.55 <sup>a</sup> | 10.73 <sup>a</sup> | 0.74 | 0.028   |
| Rikenellaceae RC9 gut group           | 8.50              | 7.44               | 8.49               | 0.49 | 0.640   |
| Ruminococcaceae UCG-010               | 3.86 <sup>b</sup> | 4.37 <sup>b</sup>  | 7.29 <sup>a</sup>  | 0.56 | 0.021   |
| Ruminobacter                          | 2.43 <sup>a</sup> | 0.36 <sup>b</sup>  | 0.33 <sup>b</sup>  | 0.40 | 0.048   |
| Bacteroides                           | 4.89              | 5.05               | 4.94               | 0.29 | 0.975   |
| Christensenellaceae R-7 group         | 2.94 <sup>b</sup> | 4.96 <sup>a</sup>  | 4.38 <sup>ab</sup> | 0.35 | 0.052   |
| [Eubacterium] coprostanoligenes group | 4.24              | 3.56               | 4.02               | 0.24 | 0.528   |
| Prevotella 1                          | 4.50              | 2.90               | 2.06               | 0.54 | 0.199   |
| Treponema 2                           | 2.28              | 3.11               | 2.27               | 0.26 | 0.364   |
| Alistipes                             | 1.99              | 2.63               | 2.75               | 0.21 | 0.319   |
| Succinivibrio                         | 2.15              | 2.48               | 2.56               | 0.55 | 0.958   |
| Ruminococcaceae UCG-014               | 2.14              | 2.81               | 1.73               | 0.31 | 0.411   |
| Ruminococcaceae UCG-013               | 1.69              | 2.18               | 2.17               | 0.18 | 0.487   |
| Lachnospiraceae NK4A136 group         | 1.78              | 1.81               | 1.60               | 0.23 | 0.934   |
| Prevotellaceae UCG-003                | 1.49              | 1.90               | 1.76               | 0.20 | 0.725   |
| Ruminococcaceae UCG-002               | 1.29              | 2.04               | 1.51               | 0.18 | 0.252   |
| Phascolarctobacterium                 | 1.56              | 1.20               | 1.35               | 0.12 | 0.514   |
| Prevotellaceae UCG-001                | 1.28              | 1.93               | 0.84               | 0.20 | 0.075   |
| Ruminococcaceae NK4A214 group         | 1.26              | 1.28               | 1.00               | 0.08 | 0.338   |
| Ruminococcus 1                        | 0.67              | 1.04               | 1.04               | 0.10 | 0.218   |
| Other                                 | 42.52             | 36.39              | 37.19              | 1.26 | 0.105   |

<sup>a,b</sup> Means within a row with different subscripts differ when  $P < 0.05$ .

<sup>1</sup> CONT, indoor-fed lambs without access to pasture; G4H, indoor-fed lambs with daily access to pasture for four hours; G8H, indoor-fed lambs with daily access to pasture for eight hours.
